# Supplementary material for: Antidepressant Treatment and Manic Switch in Bipolar I Disorder: A Clinical and Molecular Genetic Study
Source: MDPI journal article supplement (doi:10.3390/jpm12040615), 2022-04-11
Supplement: s1 [file s1]

**Supplementary Materials**

Chen et al. “Antidepressant treatment and manic switch in bipolar I disorder: a clinical and molecular genetic study”

**Figure S1.** The principal component analysis plot of the 1306 GWAS samples

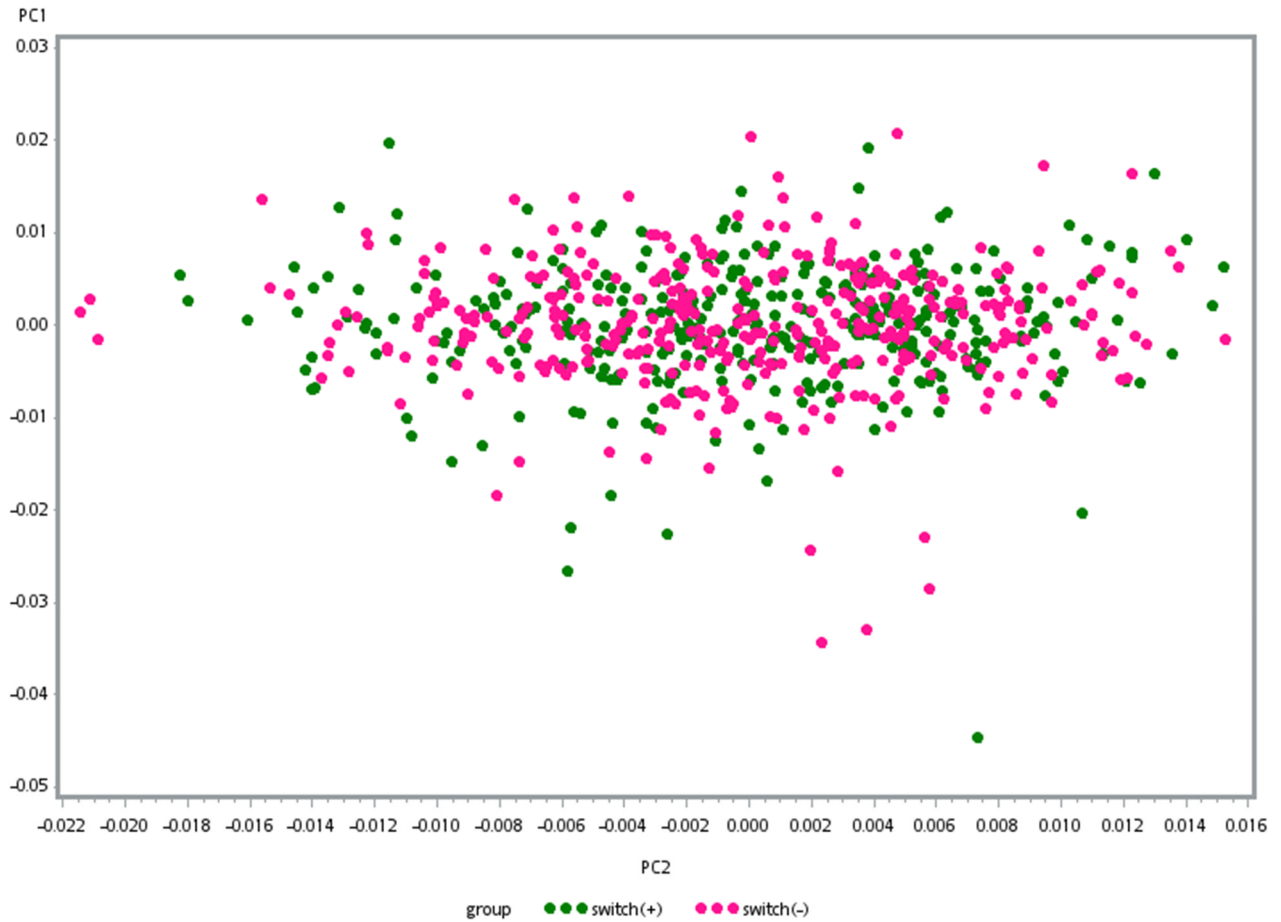

The Y and X axes are the first and second dimensions from principal component analysis based on the genome-wide IBS pairwise distances among the 746 GWAS subjects. Green crosses represented mania switch (+) and pink for mania switch (-). The two axes correspond to a reduced representation of 10,000 randomly selected SNPs into two dimensions. No clustering pattern was found and indicated that neither substantial population stratification nor cryptic relationship among the 746 subjects was found.

**Figure S2.** Q-Q plot of the fisher's test for allelic model p values of GWAS cohort (N=746)

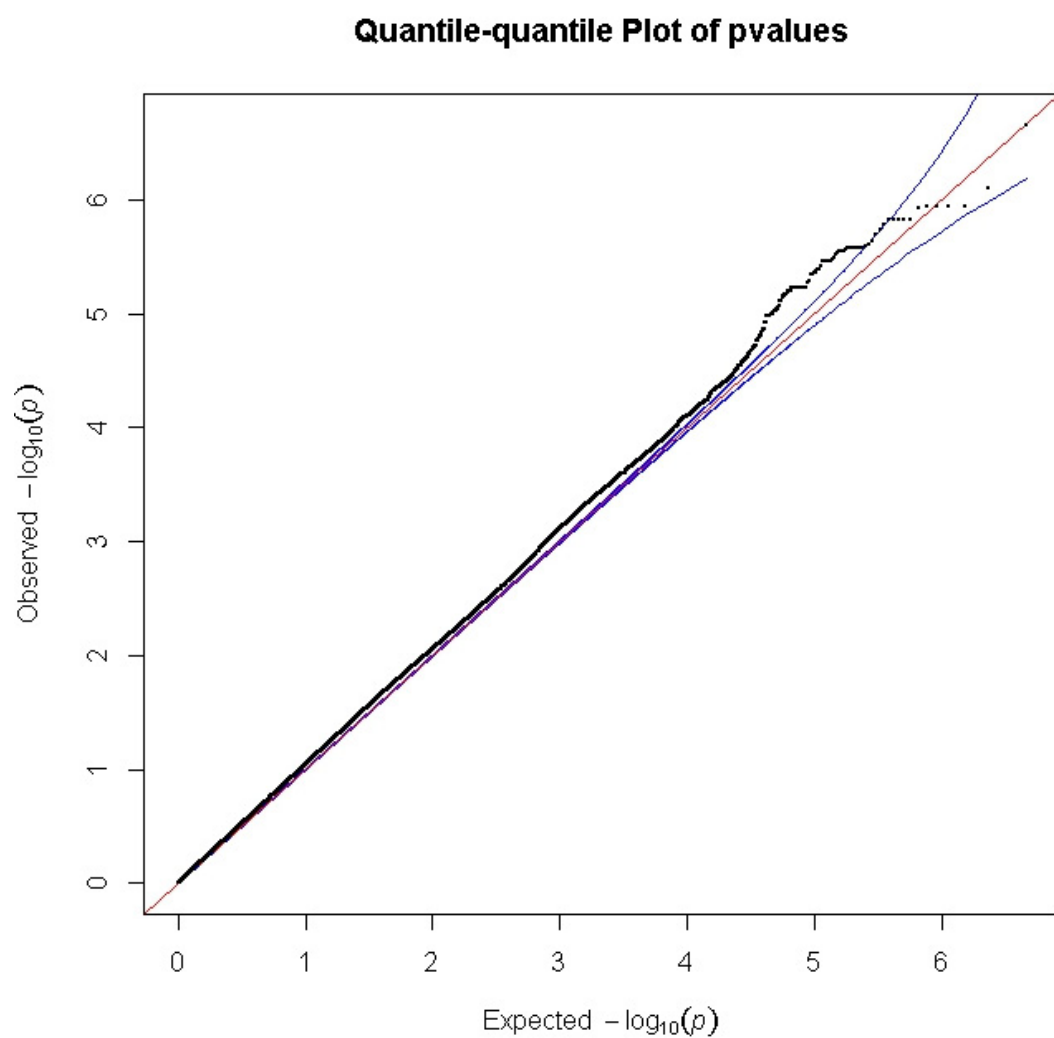

**Figure S3.** Regional plots of genetic variants in genomic location encompass rs10262219 ( $\pm 10\text{kbp}$ ) with genotyping data and association P values ( $-\log_{10}P$ ).

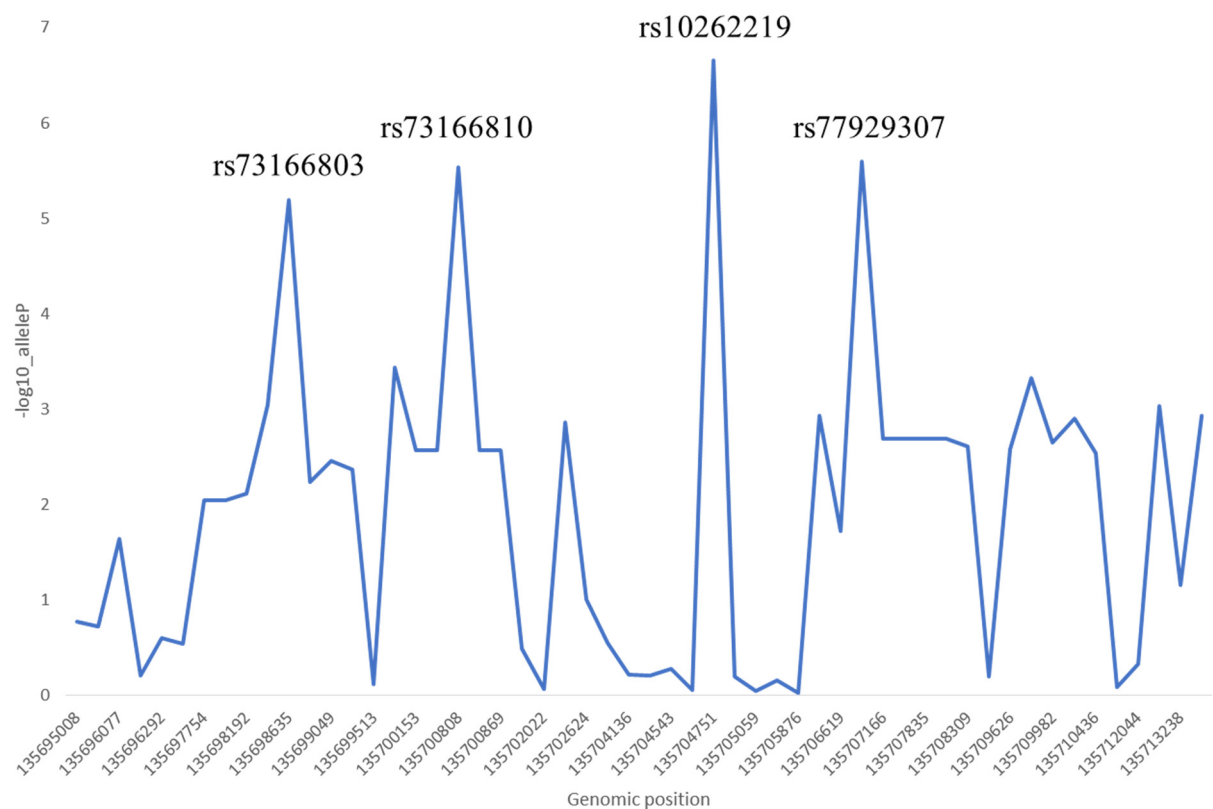

**Table S1.** Top-ten significant SNPs in GWAS at allelic model

| SNPs       | Nearest gene (s) | feature    | Alleles<br>Minor/Major | Count   |             | P value  |
|------------|------------------|------------|------------------------|---------|-------------|----------|
|            |                  |            |                        | switch  | None switch |          |
| rs10262219 | LUZP6,CHRM2*     | intergenic | C/T                    | 57/649  | 134/652     | 2.21E-07 |
| rs1889266  | COL15A1          | intronic   | C/G                    | 133/573 | 78/708      | 8.06E-07 |
| rs10116572 | GALNT12,COL15A1  | intergenic | C/T                    | 132/574 | 78/708      | 1.14E-06 |
| rs10123404 | GALNT12,COL15A1  | intergenic | G/C                    | 132/574 | 78/708      | 1.14E-06 |
| rs10988270 | COL15A1          | upstream   | A/T                    | 132/574 | 78/708      | 1.14E-06 |
| rs78553128 | ZBTB7C,CTIF      | intergenic | C/A                    | 398/308 | 344/442     | 1.16E-06 |
| rs911767   | TMEM261,PTPRD    | intergenic | G/A                    | 388/318 | 333/453     | 1.18E-06 |
| rs72871106 | DLGAP1           | intronic   | C/T                    | 61/645  | 134/652     | 1.50E-06 |
| rs72871111 | DLGAP1           | intronic   | A/G                    | 61/645  | 134/652     | 1.50E-06 |
| rs4511627  | DLGAP1           | intronic   | T/A                    | 61/645  | 134/652     | 1.50E-06 |

\*Only CHRM2 in the genes listed in the table is related to mood swings (please see discussion section). Therefore, we only verify this SNP.
